# Supplementary material for: InSAR-measured permafrost degradation of palsa peatlands in northern Sweden
Source: Copernicus journal article supplement (doi:10.5194/tc-18-1773-2024), 2024-04-17
Supplement: Supplementary file 1 [file tc-18-1773-2024-supplement.pdf]

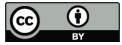

*Supplement of*

## **InSAR-measured permafrost degradation of palsa peatlands in northern Sweden**

**Samuel Valman et al.**

*Correspondence to:* Sofie Sjögersten (sofie.sjogersten@nottingham.ac.uk)

The copyright of individual parts of the supplement might differ from the article licence.

**S1. Higher resolutions InSAR images of study sites with palsa cells overlaid.**

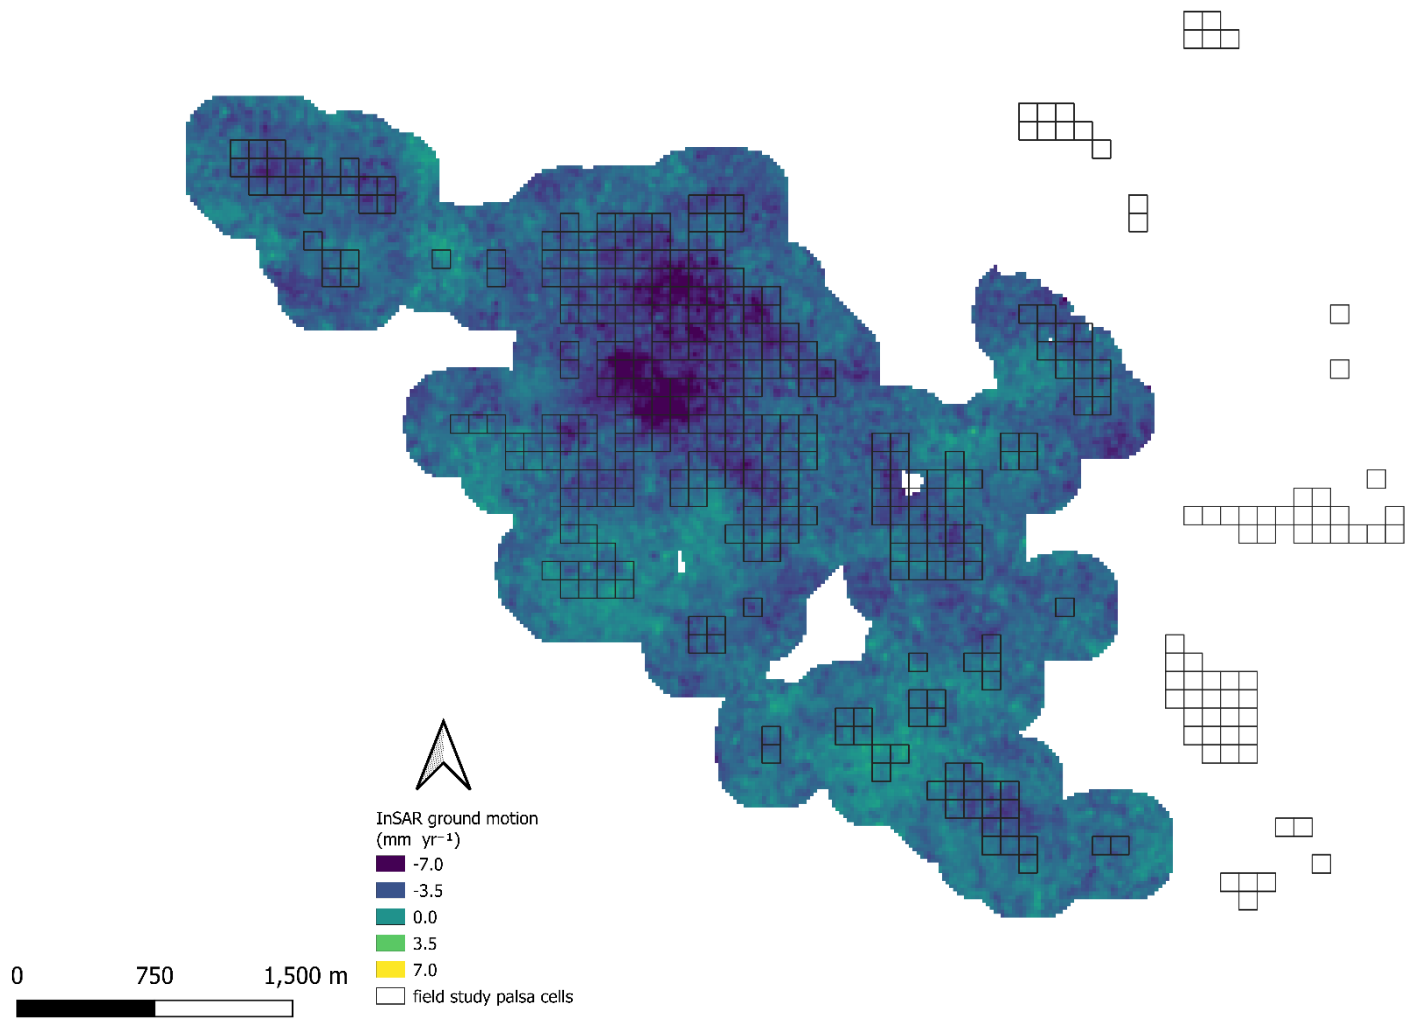

Figure. S1: InSAR derived surface motion in Árbuvuopmi. Palsa 100\*100m cells overlaid on buffered area from Backe, 2014.

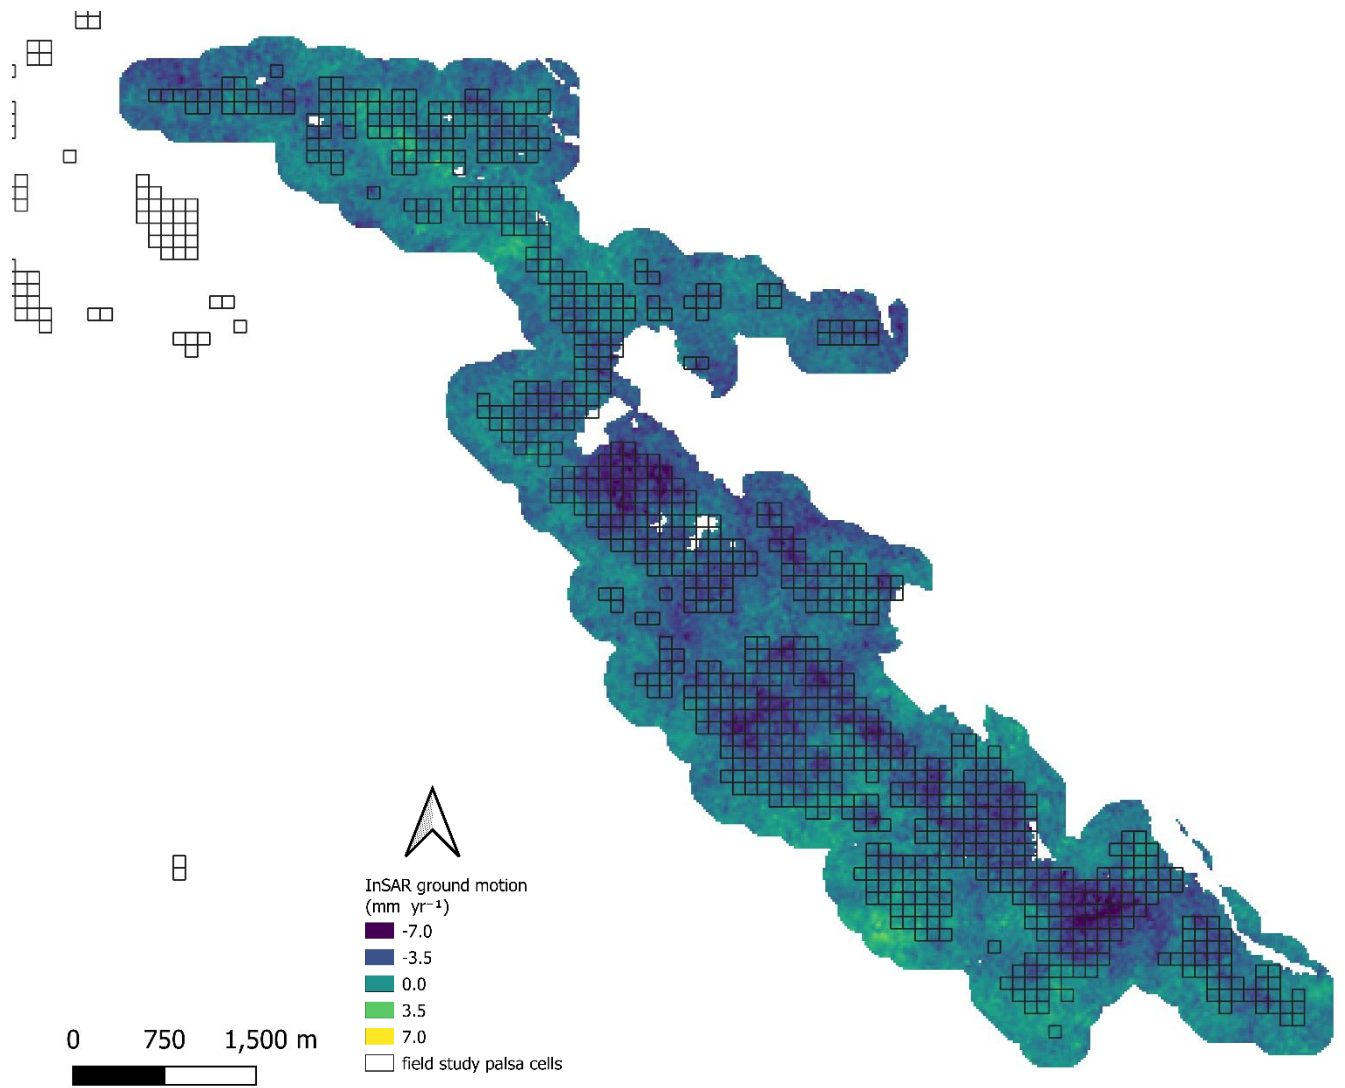

Figure. S2: InSAR derived surface motion in Vissátvuopmi complex. Palsa 100\*100m cells overlaid on buffered area from Backe, 2014.

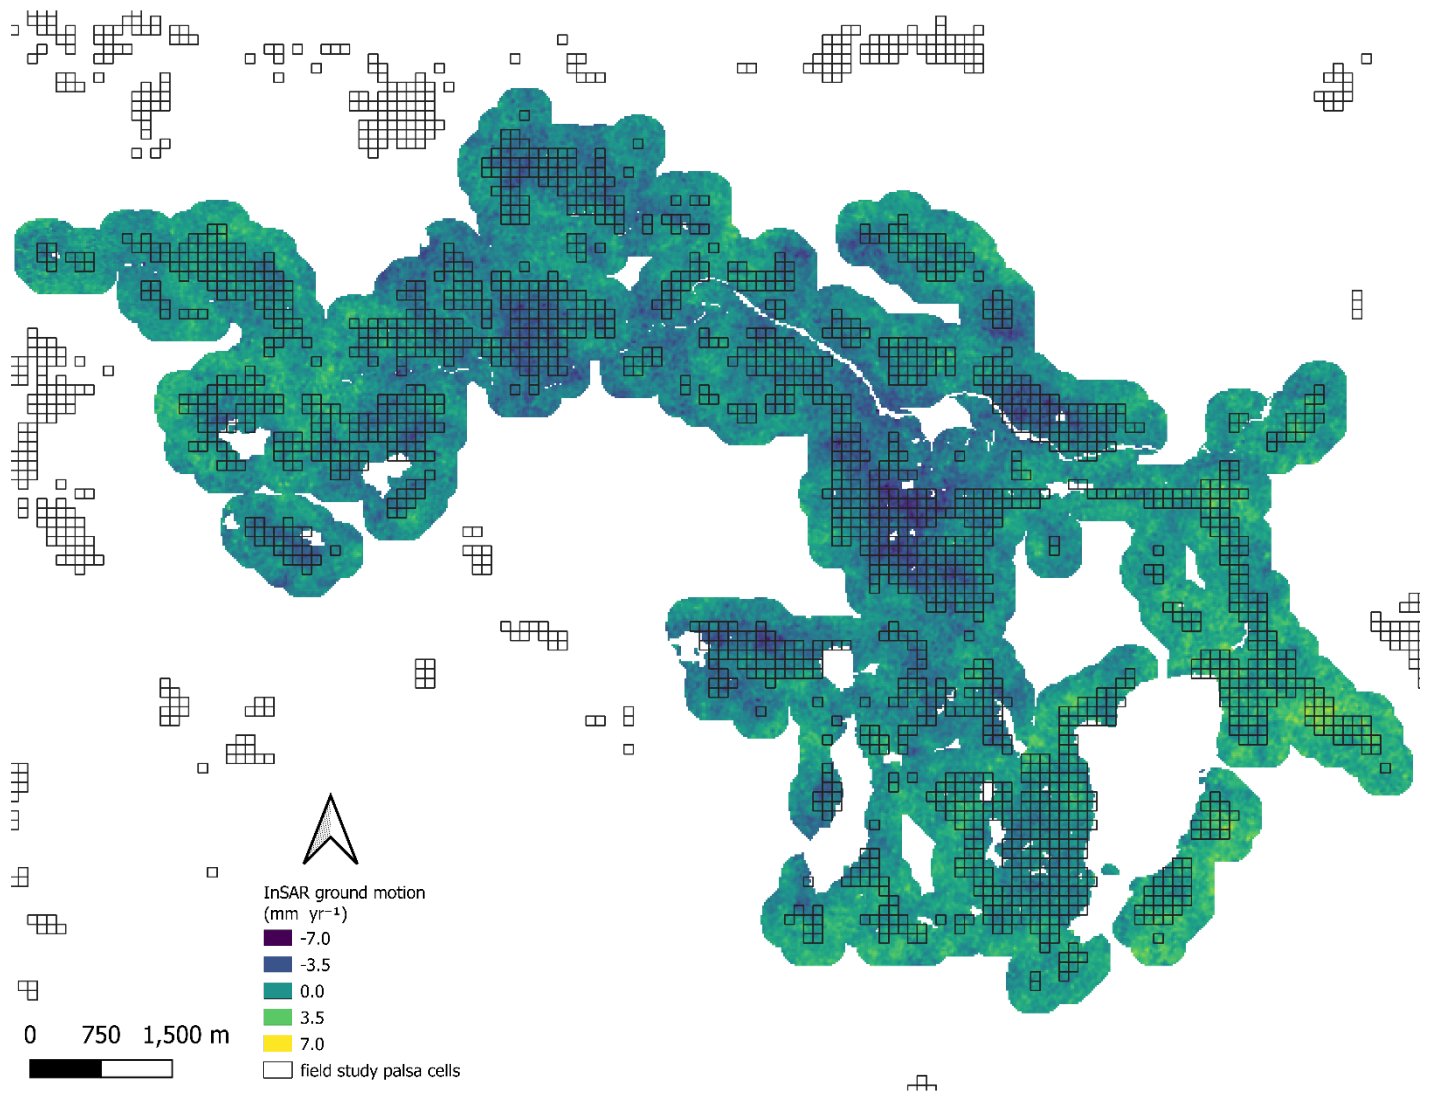

Figure. S3: InSAR derived surface motion in Tavvavuoma complex. Palsa 100\*100m cells overlaid on buffered area from Backe, 2014.

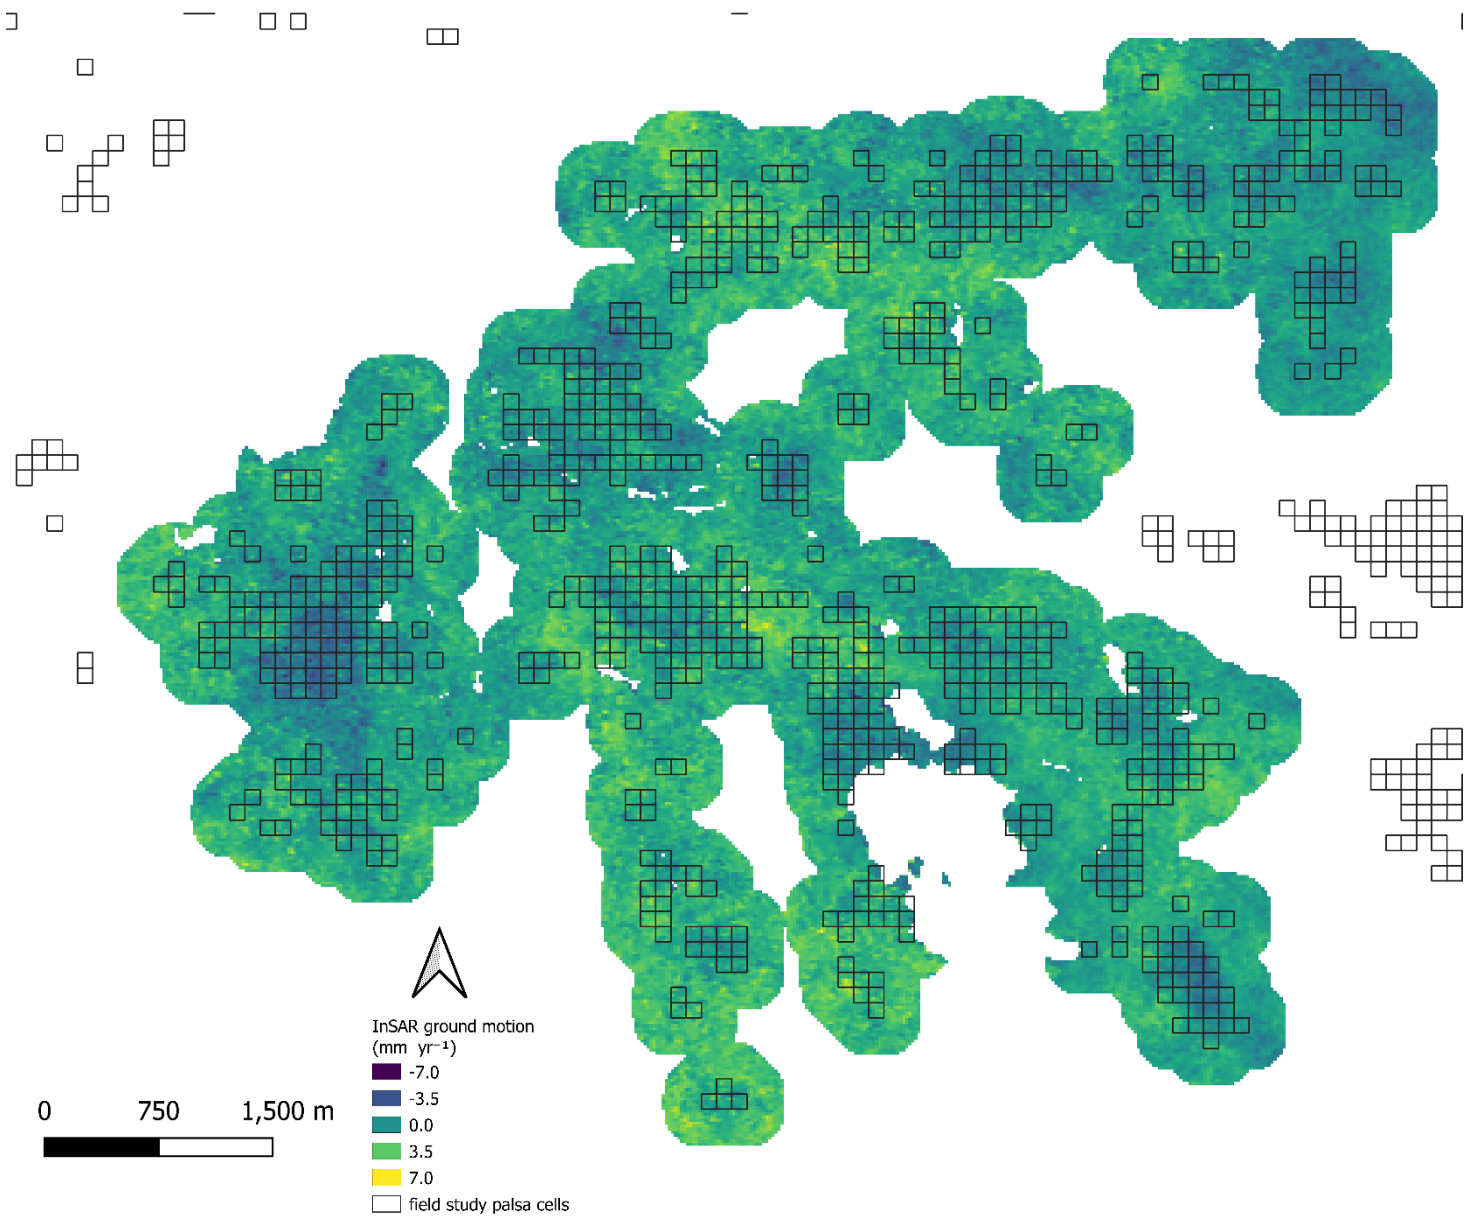

Figure. S4: InSAR derived surface motion in Western Tavvavuoma complex. Palsa 100\*100m cells overlaid on buffered area from Backe, 2014.

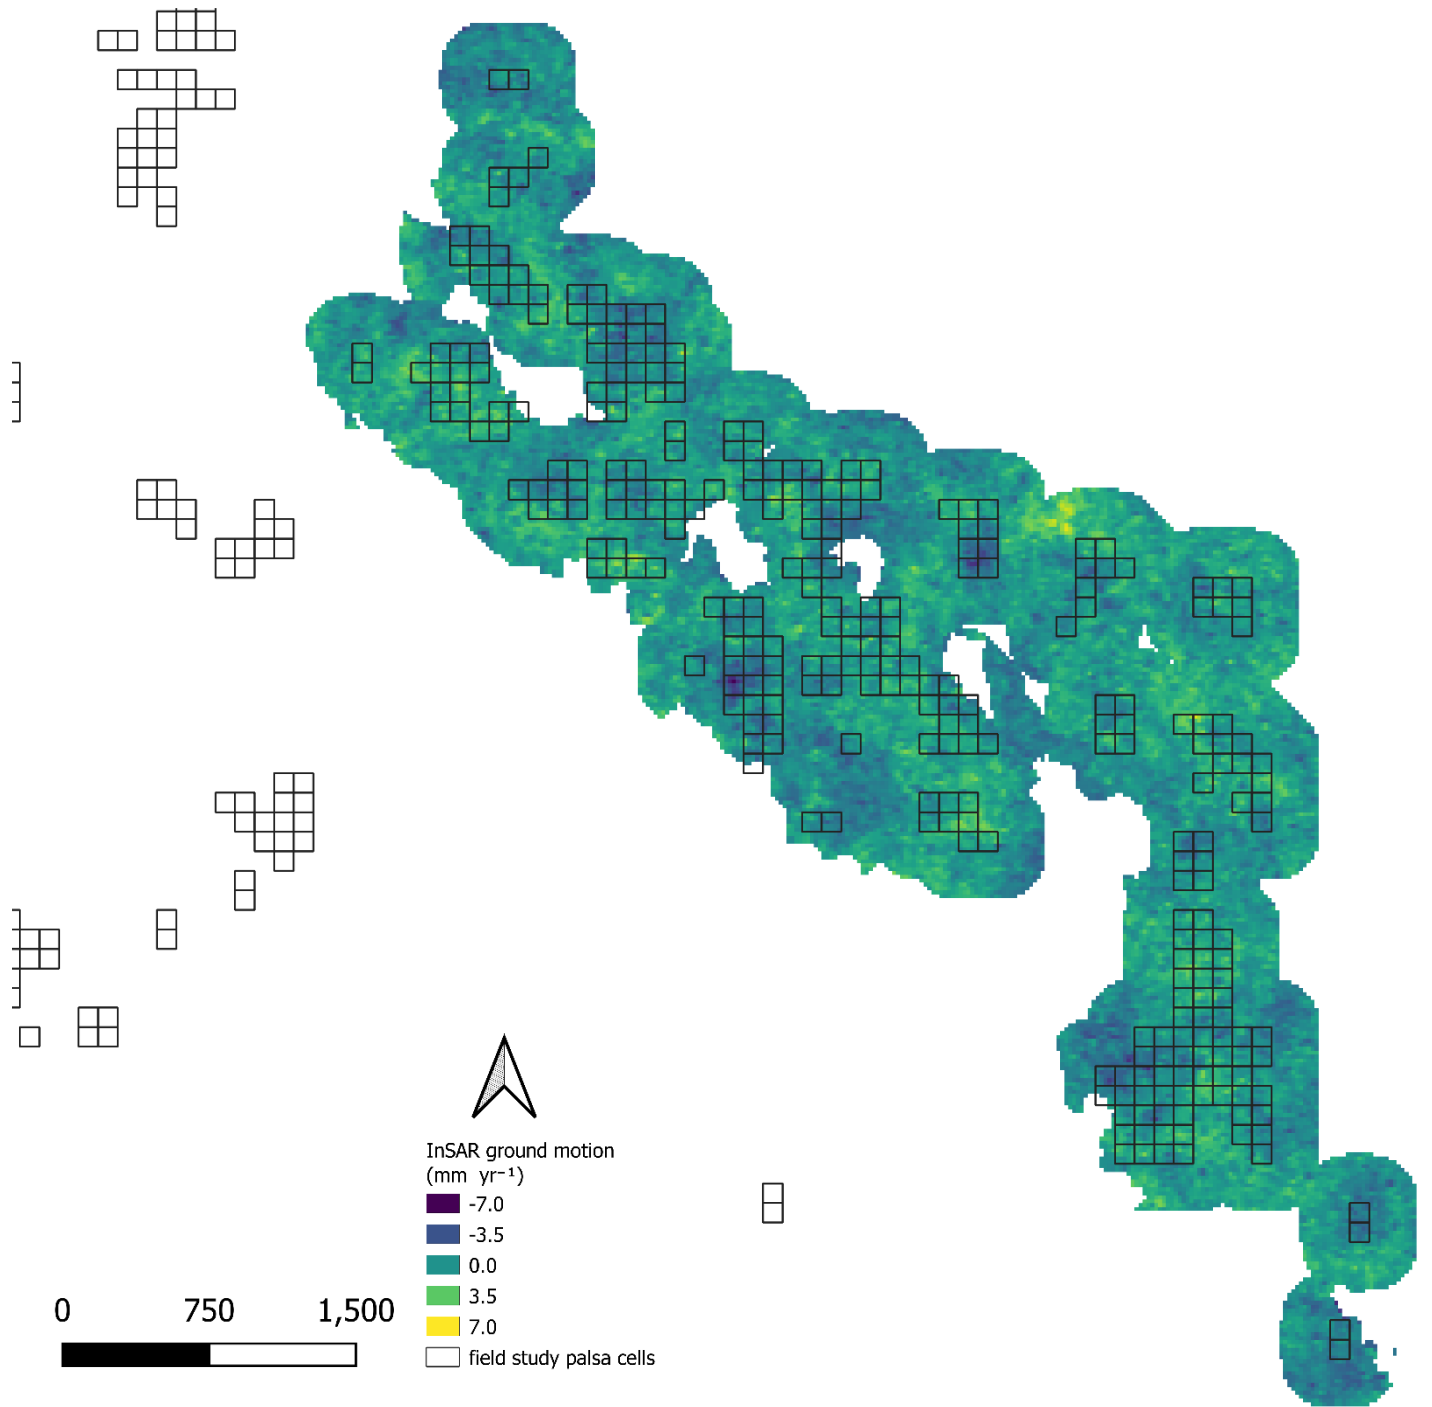

Figure. S5: InSAR derived surface motion in Gipmevuopmi complex. Palsa 100\*100m cells overlaid on buffered area from Backe, 2014.

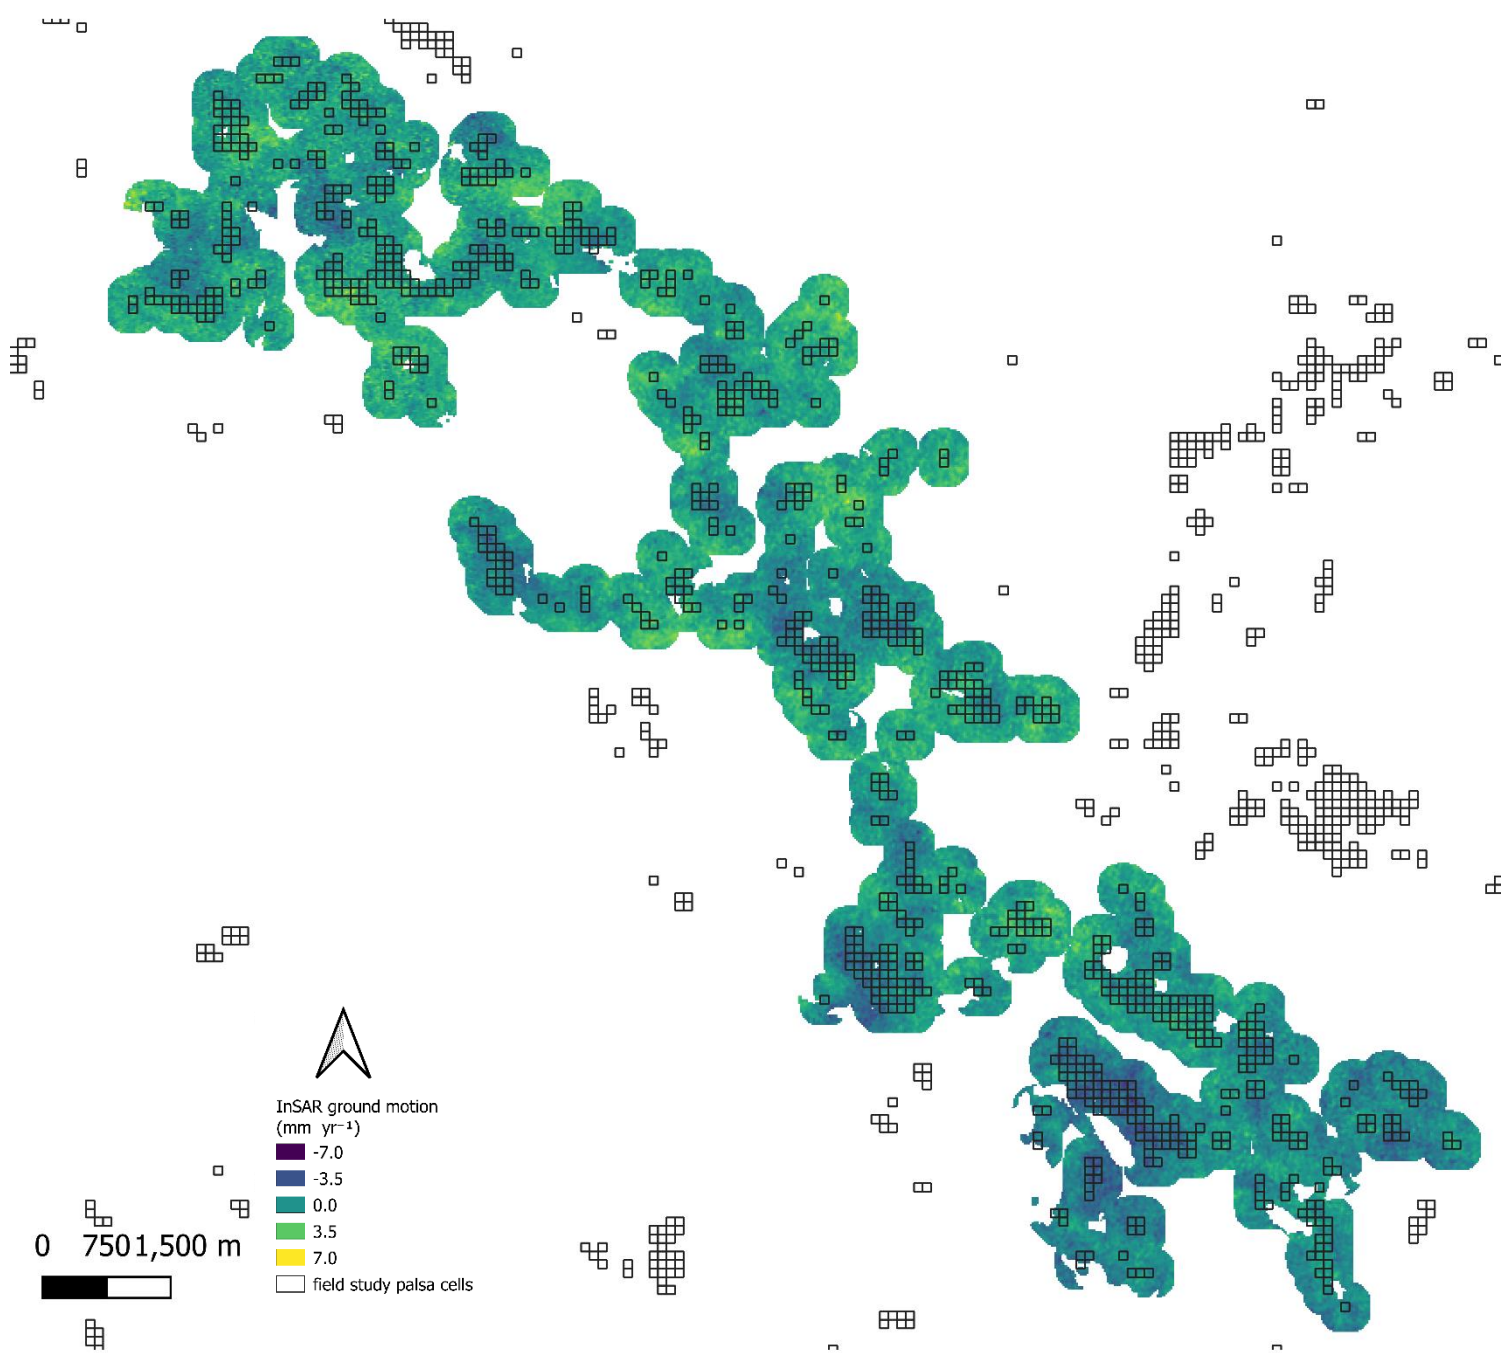

Figure. S6: InSAR derived surface motion in Ragesvuomus-Pirttimysvuoma complex. Palsa 100\*100m cells overlaid on buffered area from Backe, 2014.

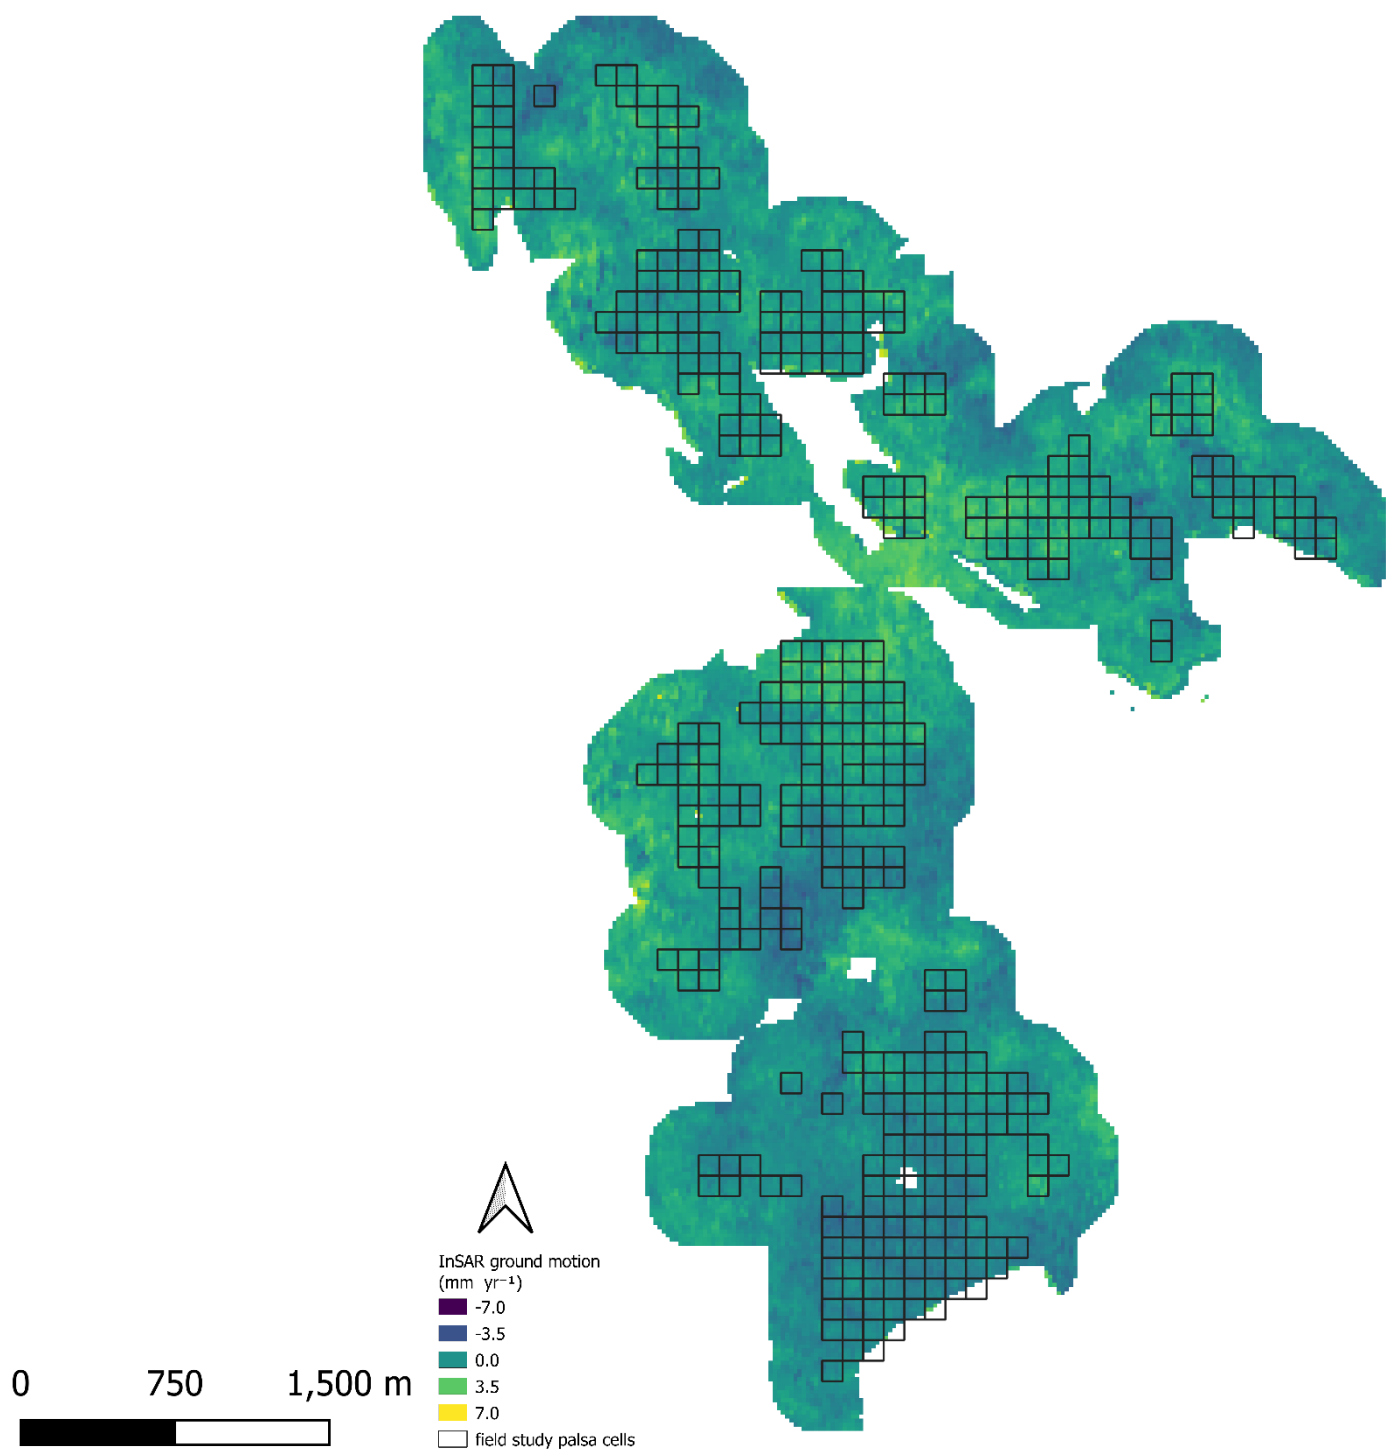

Figure. S7: InSAR derived surface motion in Sirccam complex. Palsa 100\*100m cells overlaid on buffered area from Backe, 2014.



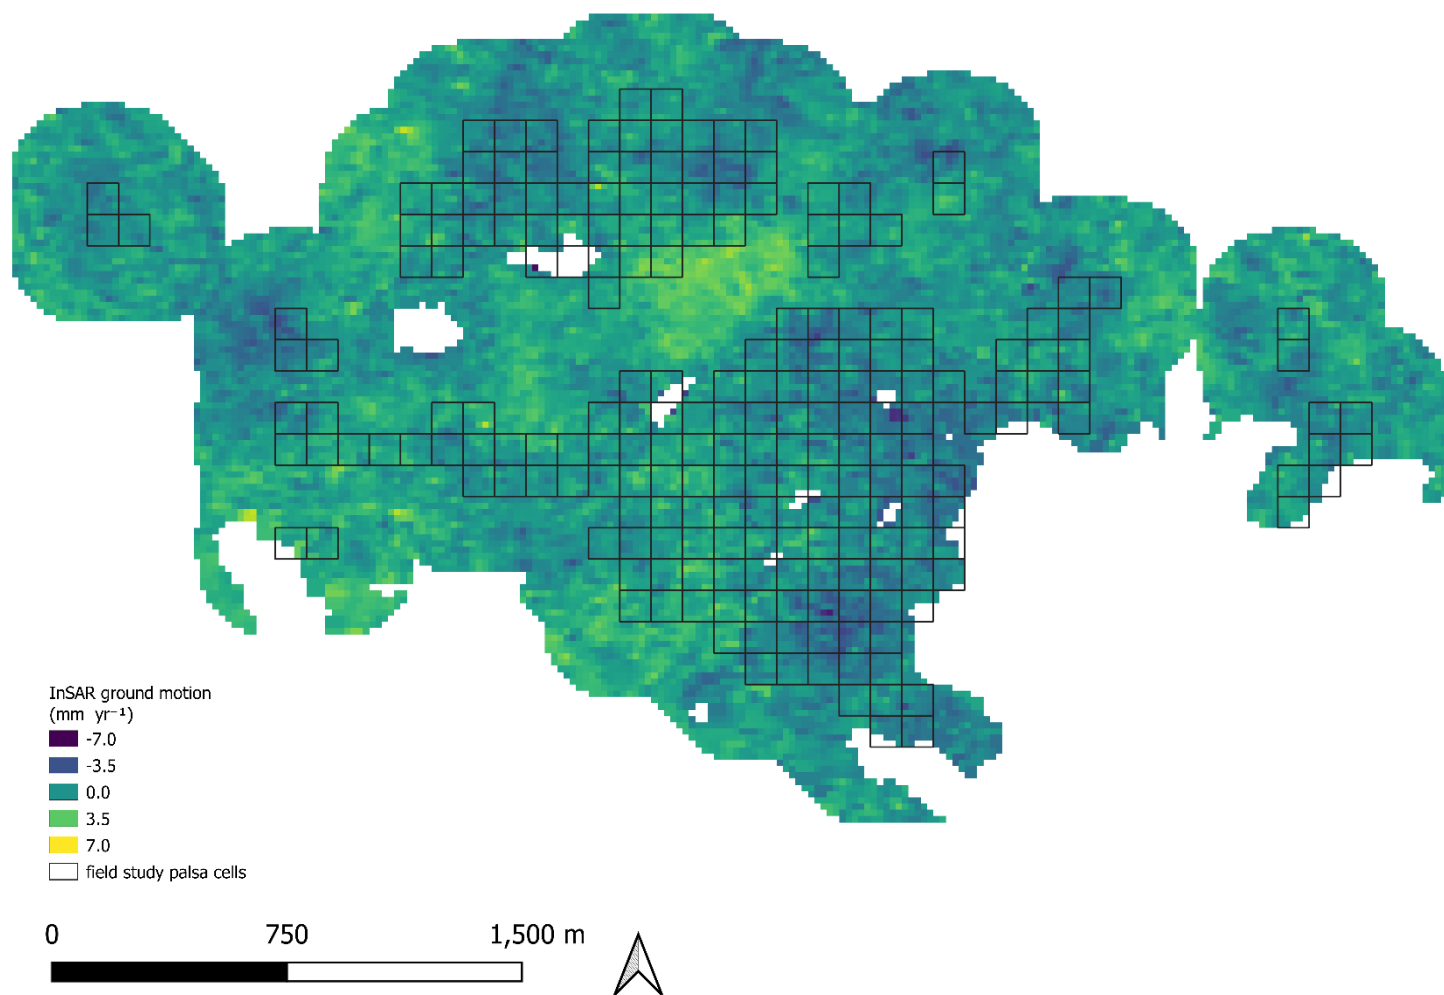

Figure. S8: InSAR derived surface motion in Ribasvuomus complex. Palsa 100\*100m cells overlaid on buffered area from Backe, 2014.

## S2. Orthophotos InSAR ground motion examples

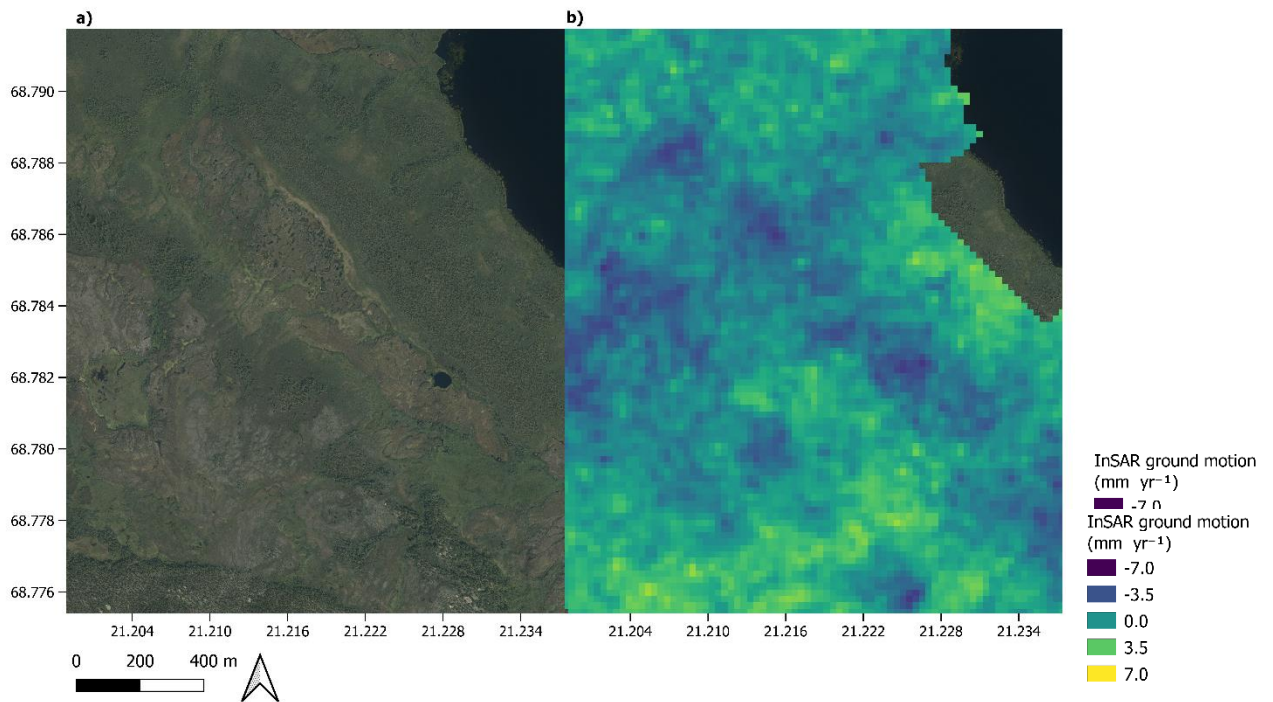

Figure. S9: Aerial (a) and InSAR derived ground motion (b) imagery of palsa at Vissátvuopmi. Airborne imagery surveys commissioned by the 194 Swedish Mapping, Cadastral and Land Registration Authority ([www.lantmateriet.se](http://www.lantmateriet.se); © Lantmäteriet).

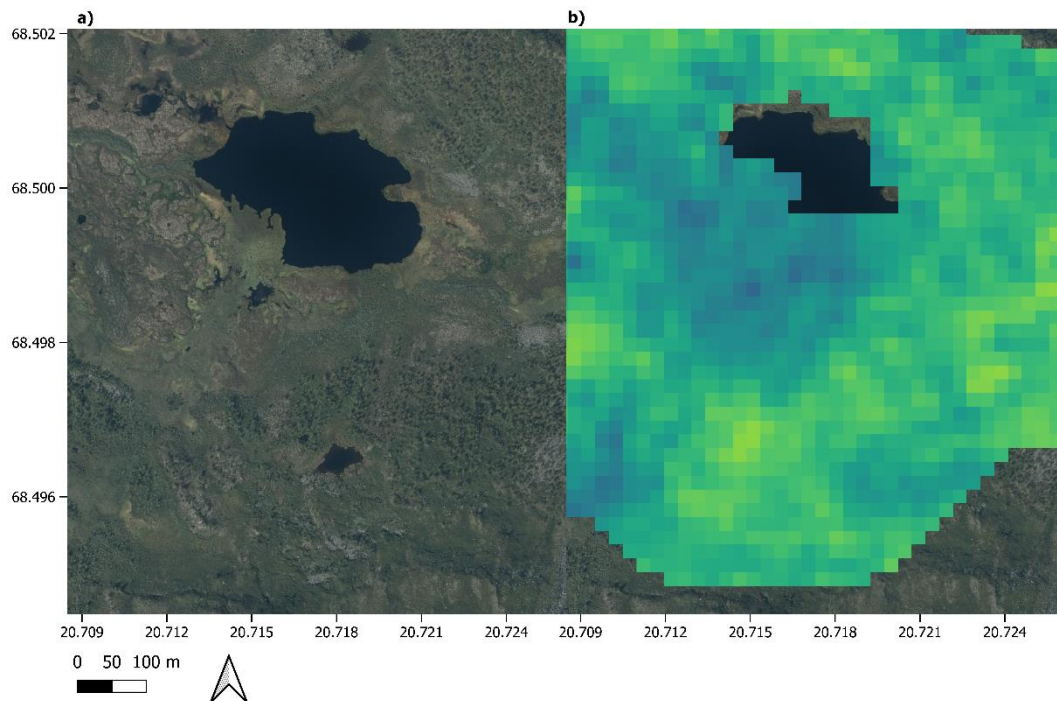

Figure. S10: Aerial (a) and InSAR derived ground motion (b) imagery of palsa at Tavvavuoma. Airborne imagery surveys commissioned by the 194 Swedish Mapping, Cadastral and Land Registration Authority ([www.lantmateriet.se](http://www.lantmateriet.se); © Lantmäteriet).

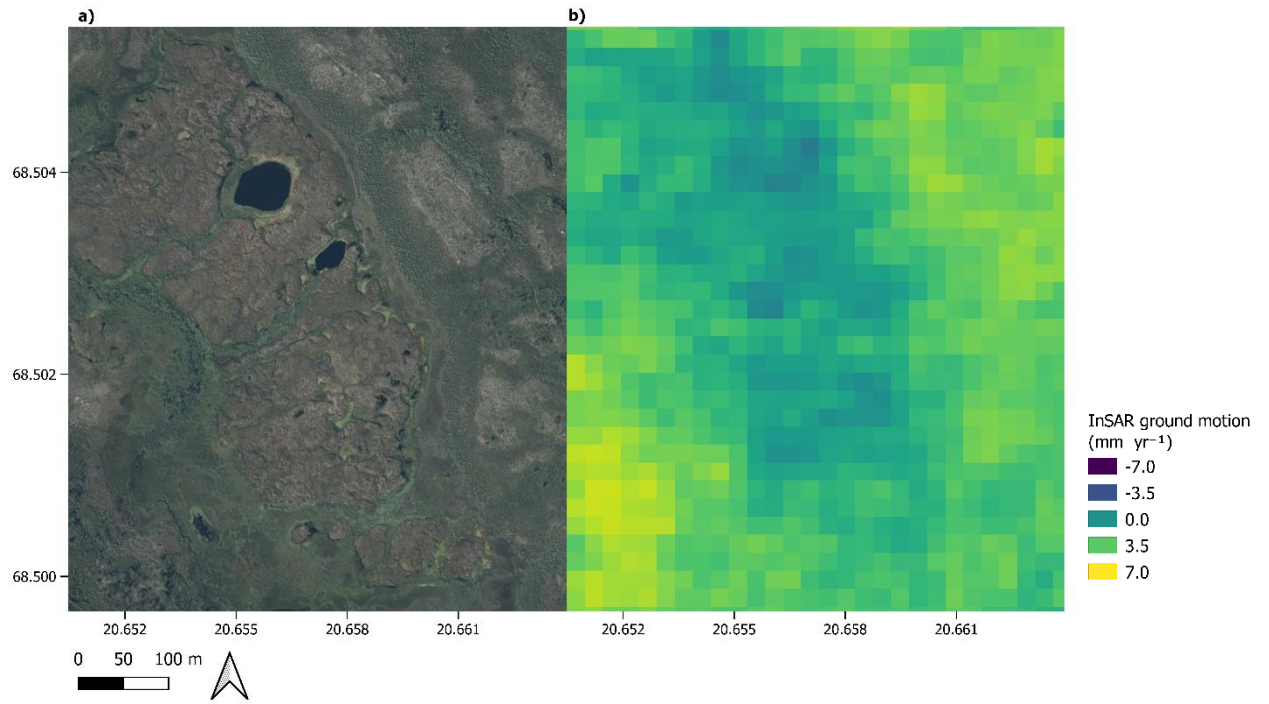

Figure. S11: Aerial (a) and InSAR derived ground motion (b) imagery of palsa at Western Tavvavuoma. Airborne imagery surveys commissioned by the 194 Swedish Mapping, Cadastral and Land Registration Authority ([www.lantmateriet.se](http://www.lantmateriet.se); © Lantmateriet).

### S3. Climatic variables

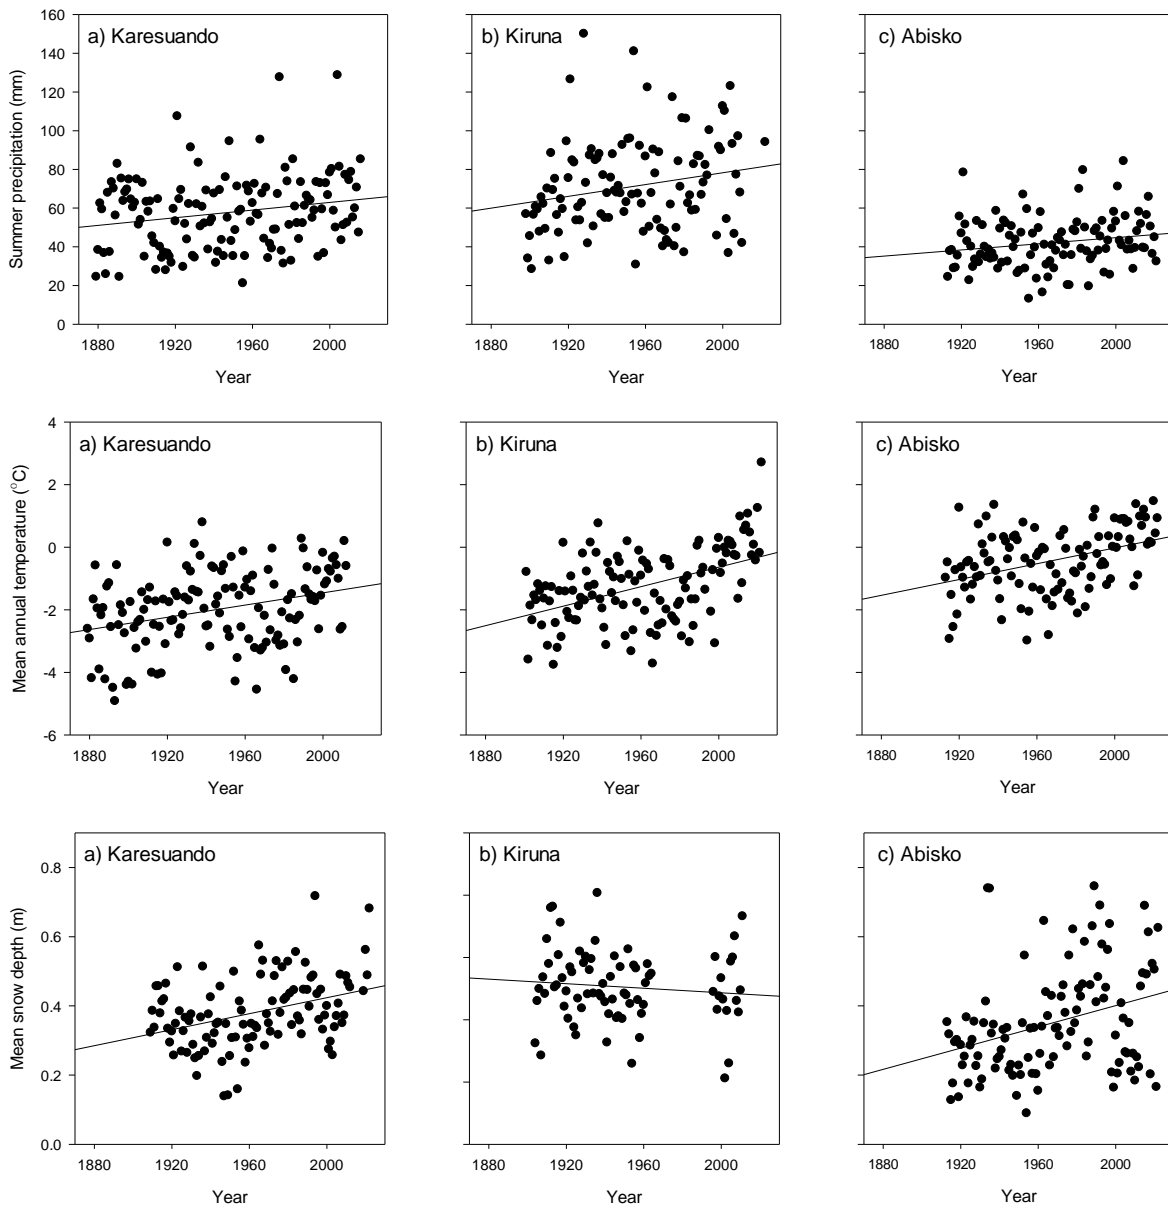

Figure. S12: Long term climatic variables that were not found to have clear temporal relationships at any of the three weather stations.

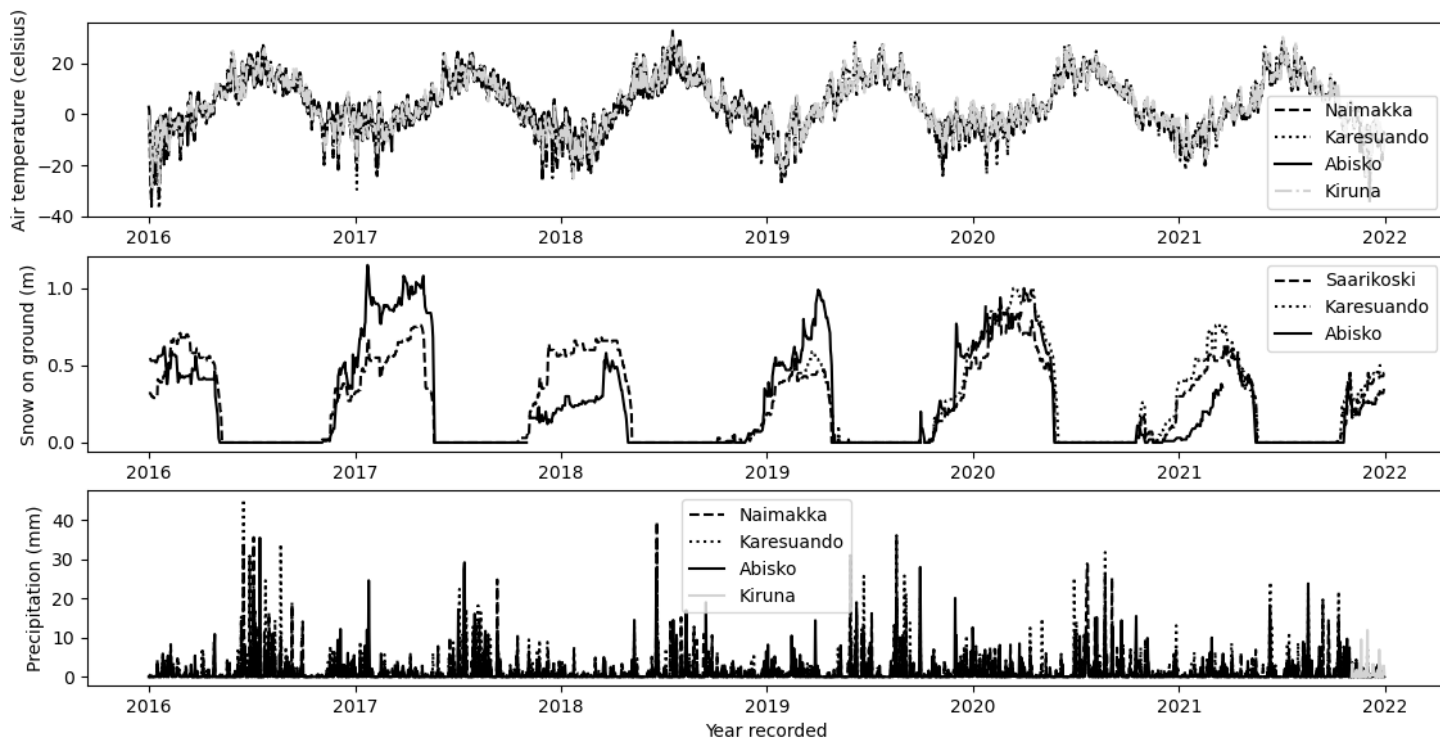

Figure. S13: Daily air temperature, rainfall, and precipitation for the period that InSAR data was captured over.

#### S4. Field Photographs

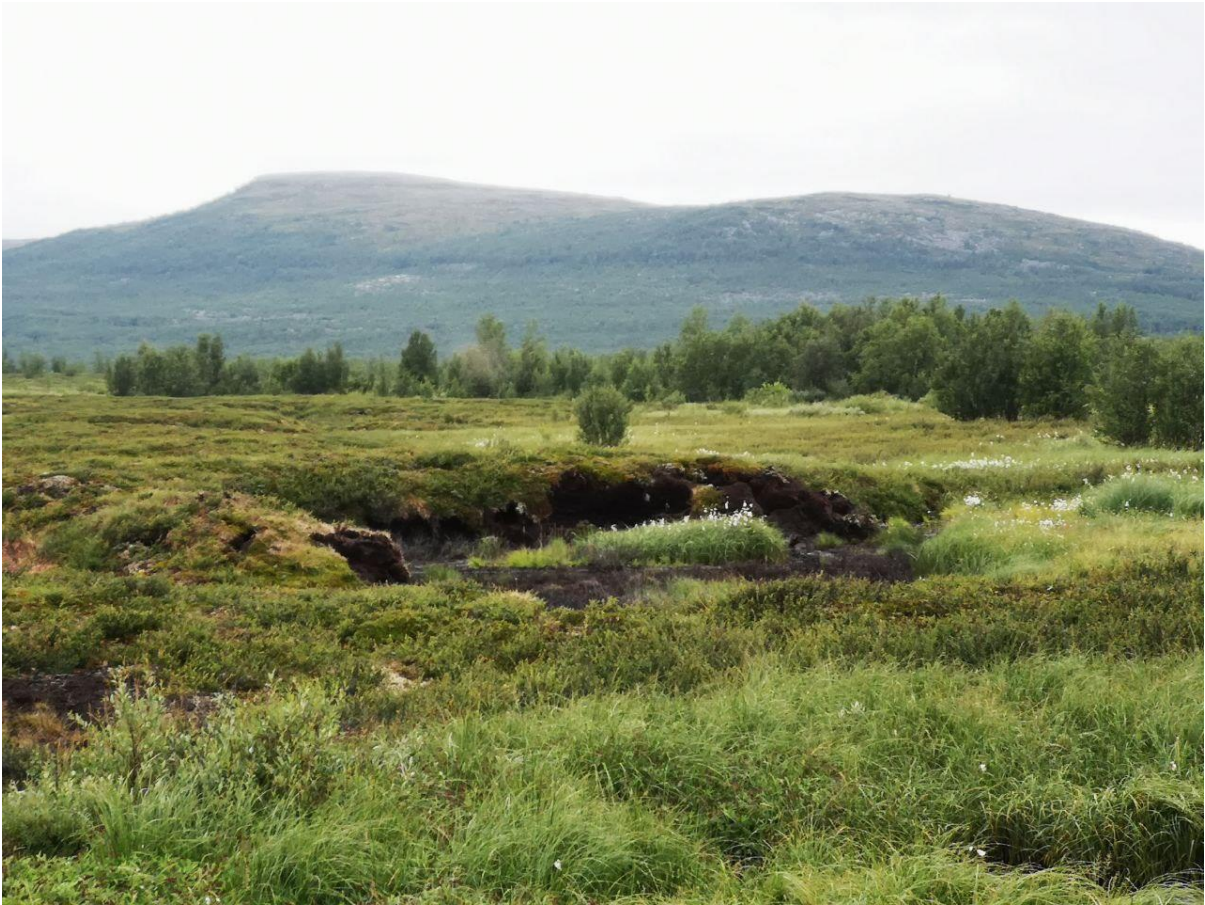

Figure. S14: Degrading palsja edge at Vissátvuopmi provided by Matthias Stiewert
